# Supplementary material for: Dying among older adults in Switzerland: who dies in hospital, who dies in a nursing home?
Source: PubMed Central journal article supplement (PMC5035491; doi:10.1186/s12904-016-0156-x), 2016-09-23
Supplement: 12904_2016_156_MOESM1_ESM.pdf [file 12904_2016_156_MOESM1_ESM.pdf]

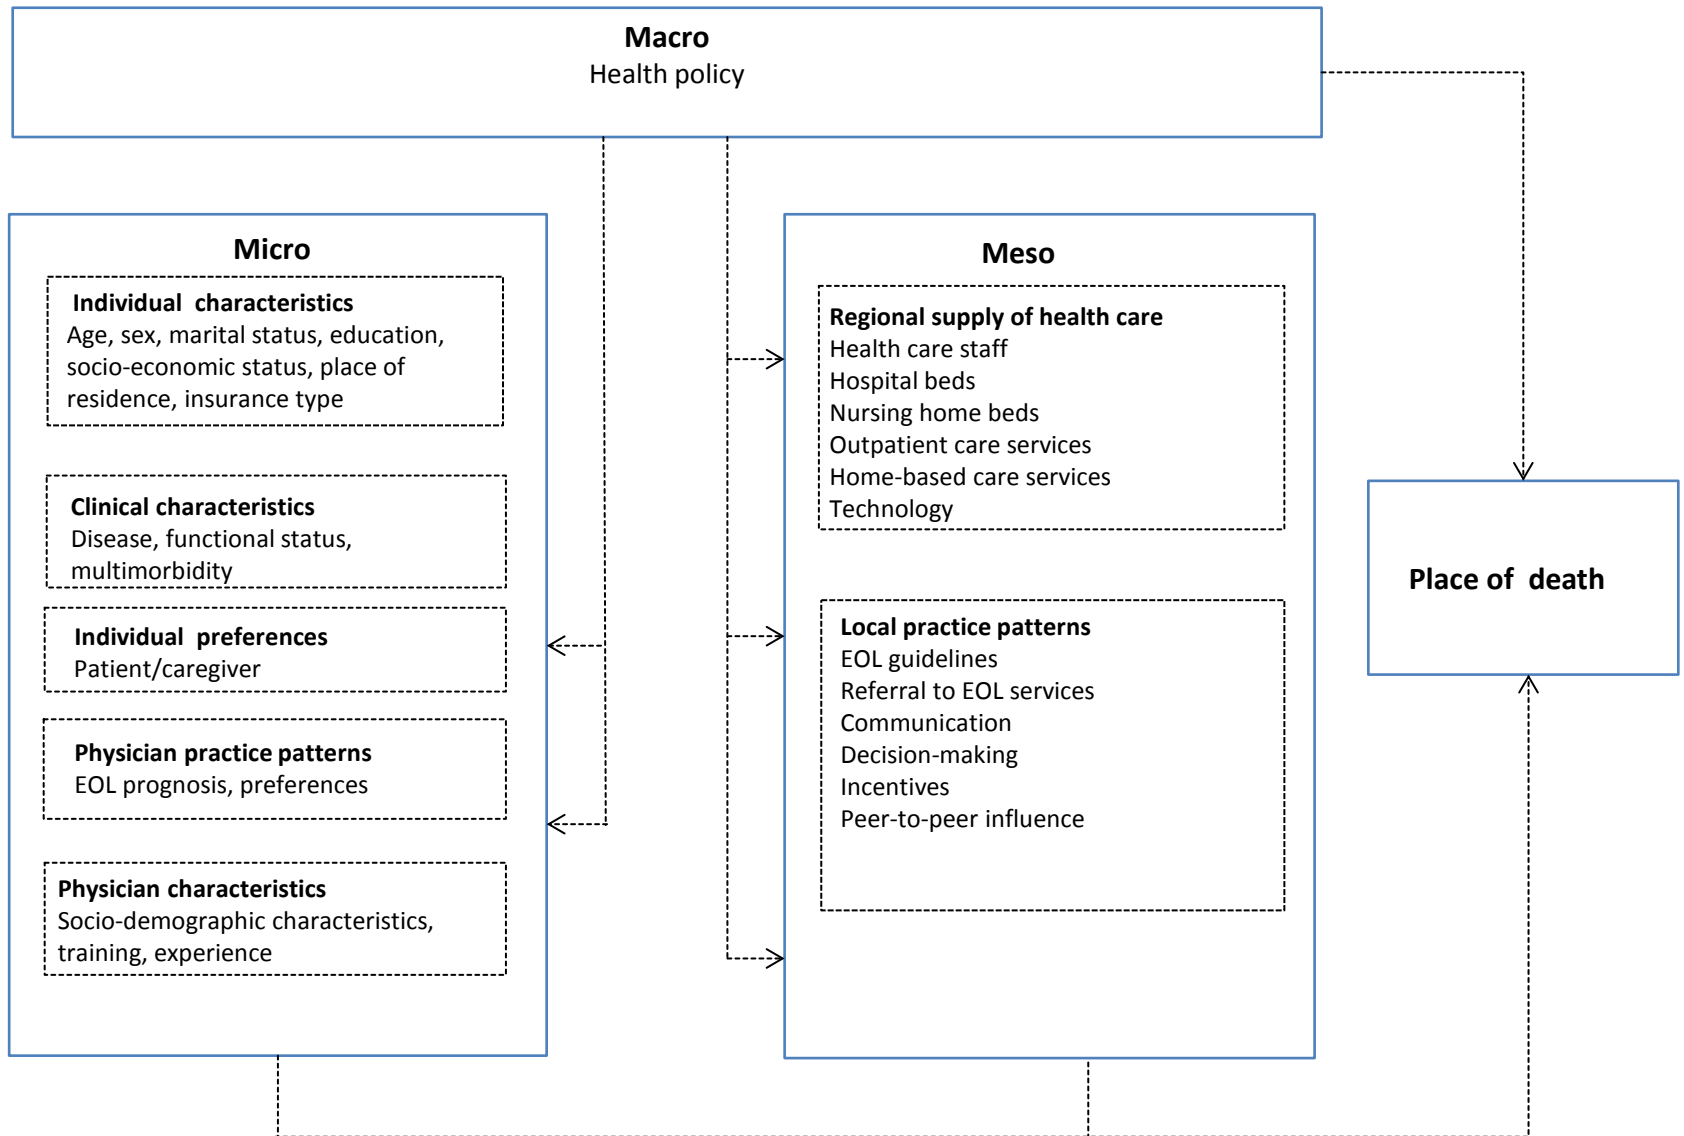

**Figure S1.** Conceptual framework of selected aspects influencing place of death.
