# Supplementary material for: Dying among older adults in Switzerland: who dies in hospital, who dies in a nursing home?
Source: PubMed Central journal article supplement (PMC5035491; doi:10.1186/s12904-016-0156-x), 2016-09-23

A - cantons

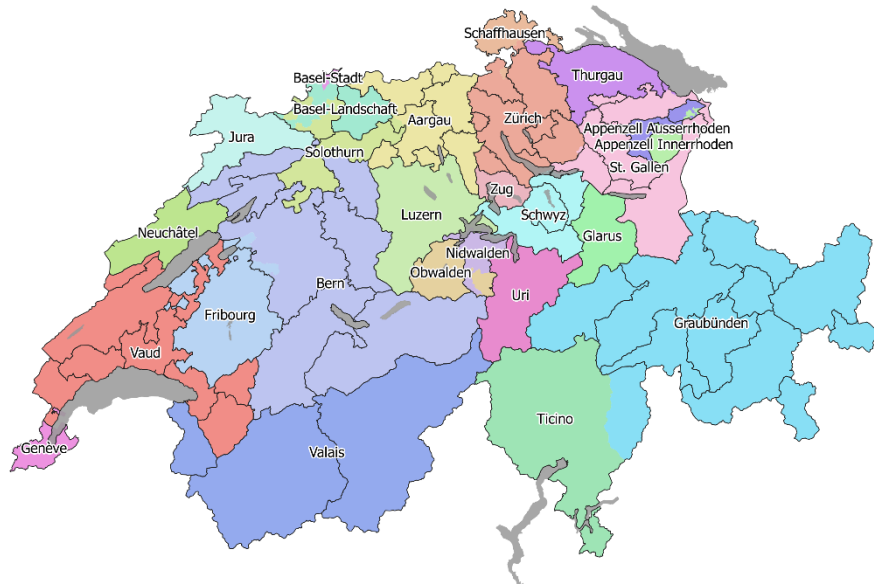

Language region [564]

- French [134]
- German [402]
- Italian [28]

B - language regions

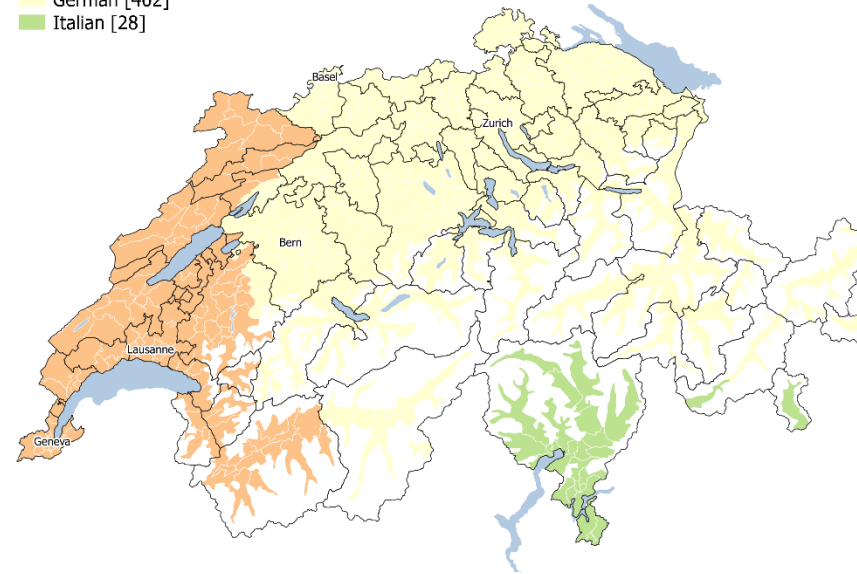

Urbanization [564]

- Urban [57]
- Peri-urban [274]
- Rural [233]

C - urbanization

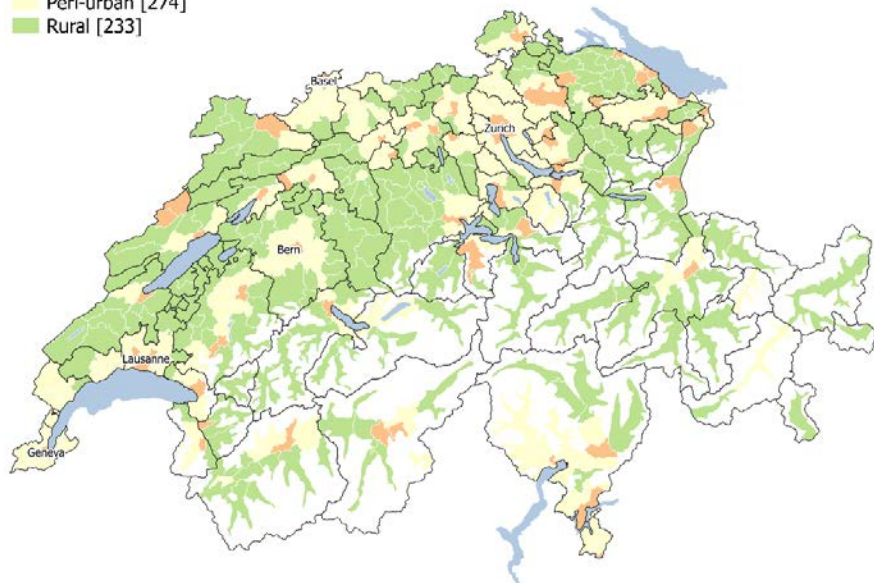

Swiss-SEP tertile [564]

- 1st (lowest) [172]
- 2nd [253]
- 3rd (highest) [139]

D - Swiss-SEP index

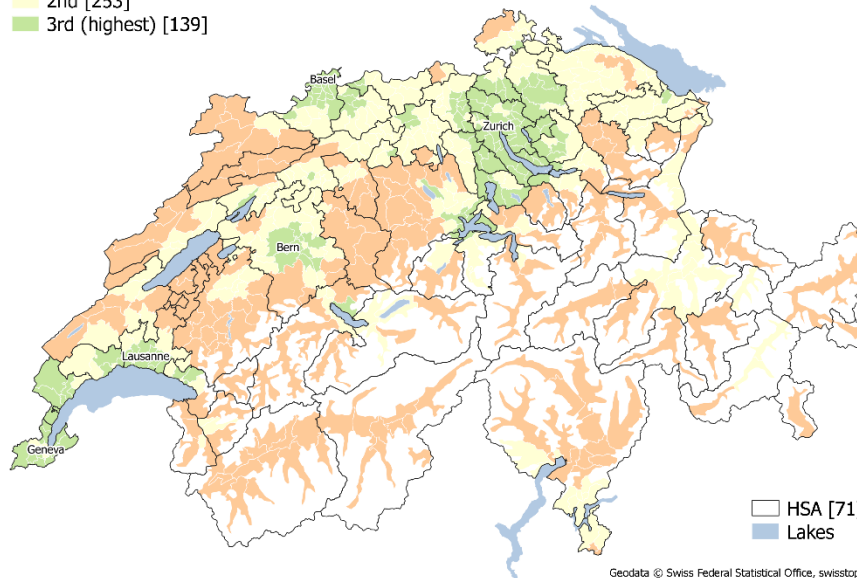

Supplement: 12904_2016_156_MOESM2_ESM.pdf [file 12904_2016_156_MOESM2_ESM.pdf]
